# Supplementary material
Source: bioRxiv or medRxiv preprint supplement (https://www.biorxiv.org/highwire/filestream/122175/field_highwire_adjunct_files/1/256636-2.pdf)
Supplement: Supplementary file [file 256636-2.pdf]

## Supplemental Material – Table of contents

Supplemental Fig. S1 - Patterns of selection in the polypyrimidine tract (page 2-3)

Supplemental Fig. S2 – Enrichment of *de novo* mutations in diagnosed and undiagnosed probands (page 4)

Supplemental Fig. S3 – Relationship between positive predictive values and population genetics metrics (page 5-6)

Supplemental Table S1 - *De novo* mutations in non-canonical near splice positions not thought to be diagnostic (page 7)

Supplemental Table S2 - Phenotypic data on probands with likely diagnostic near-splice *de novo* mutations (page 8-9)

Supplemental Table S3 – Splicing pathogenicity scores for near-splice *de novo* SNVs (page 10-11)

Supplemental Fig. S4 – Outcomes of minigene assays for splicing validations (page 12-15)

Supplemental Fig. S5 – Proportion of parental variants in high pLI gene by pathogenicity score (page 16-17)

Supplemental Fig. S6 – Mutability adjusted proportion of singletons by pathogenicity score, excluding canonical splice sites (page 18-19)

Supplemental Fig. S7 – Proportion of parental variants in high pLI gene by pathogenicity score, excluding canonical splice sites (page 20-21)

Supplemental Table S5 – Details of variants selected for validation assay (page 22)

Supplemental Table S6 – Primers used to amplify region of interest from patient DNA (page 23)

Supplemental Table S7 - Primers to PCR amplify ref and alt intron with Gibson overhangs (page 24)

Supplemental Table S8 – PCR primers to amplify vector backbone (page 25)

Supplemental Table S9 - RT-PCR primers (page 25)

Supplemental Table S10 - Sequencing primers (page 25)

**NB – due to its size, Supplemental Table S4 is provided as a separate Excel file**

**Supplemental Fig. S1 – Patterns of selection in the polypyrimidine tract**

Mutability adjusted proportion of singletons (MAPS), with 95% confidence intervals (CI) across region upstream of the acceptor site (including polypyrimidine tract region) split by changes from a pyrimidine to a purine (PyPu) vs all other changes in DDD unaffected parents (A) and ExAC data (B). Deficit of variants in genes with high pLI in unaffected parents recruited as part of DDD study across region upstream of the acceptor site (including polypyrimidine tract region) split by changes from a pyrimidine to a purine (PyPu) vs all other changes (C).

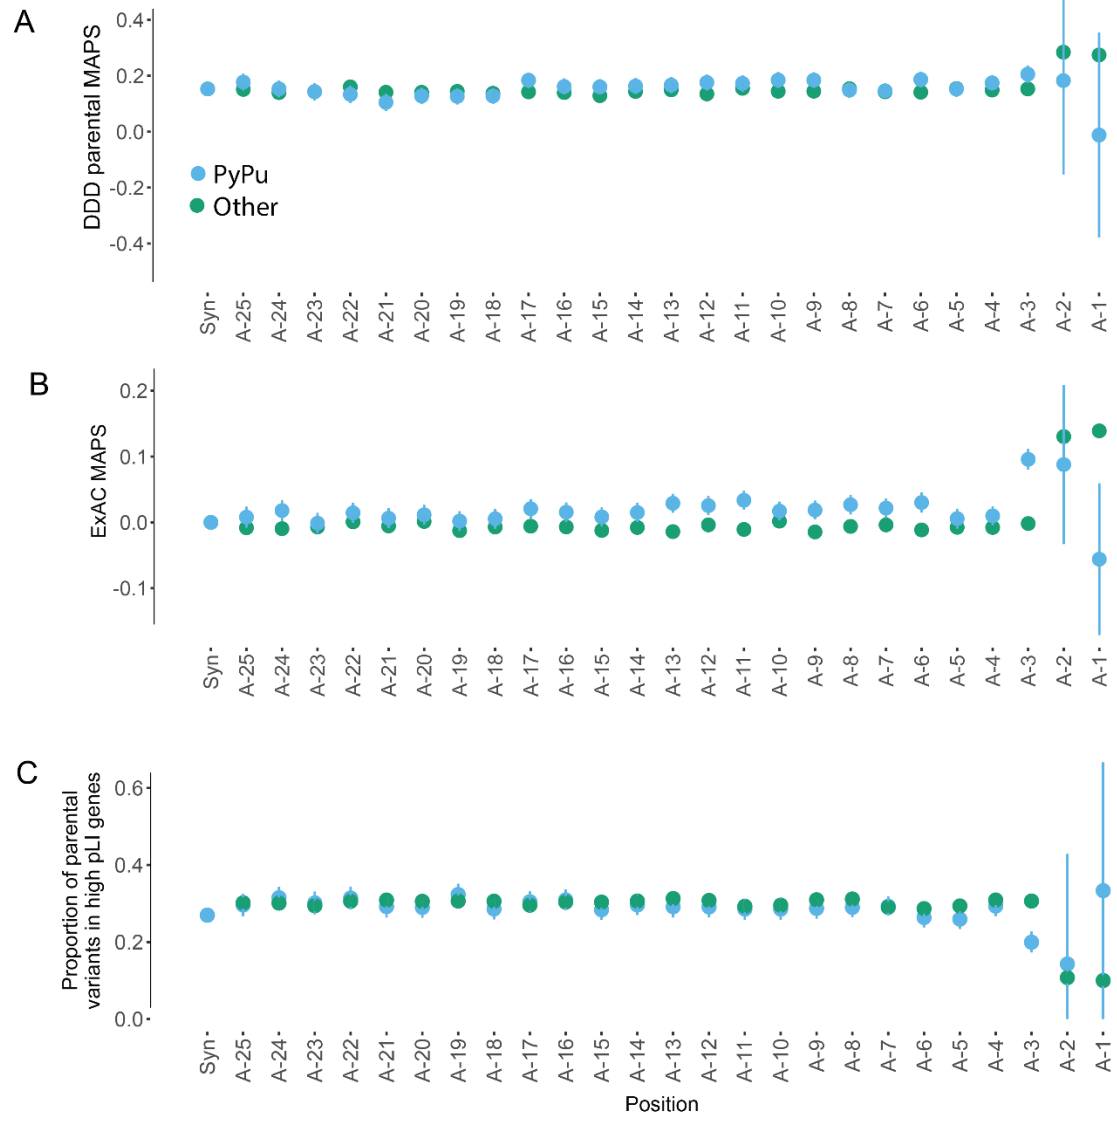

### Supplemental Fig. S2 – Enrichment of *de novo* mutations in diagnosed and undiagnosed probands

Enrichment of *de novo* mutations (DNMs) in dominant DD-associated genes across the splicing region in 1417 DDD probands with a clinician confirmed diagnosis (Diagnosed cases) and 3364 DDD probands lacking a potentially diagnostic variant (Undiagnosed cases), with FDR corrected Poisson p-values. Splice acceptor and splice donor consensus sequences shown below, as in Figure 1.

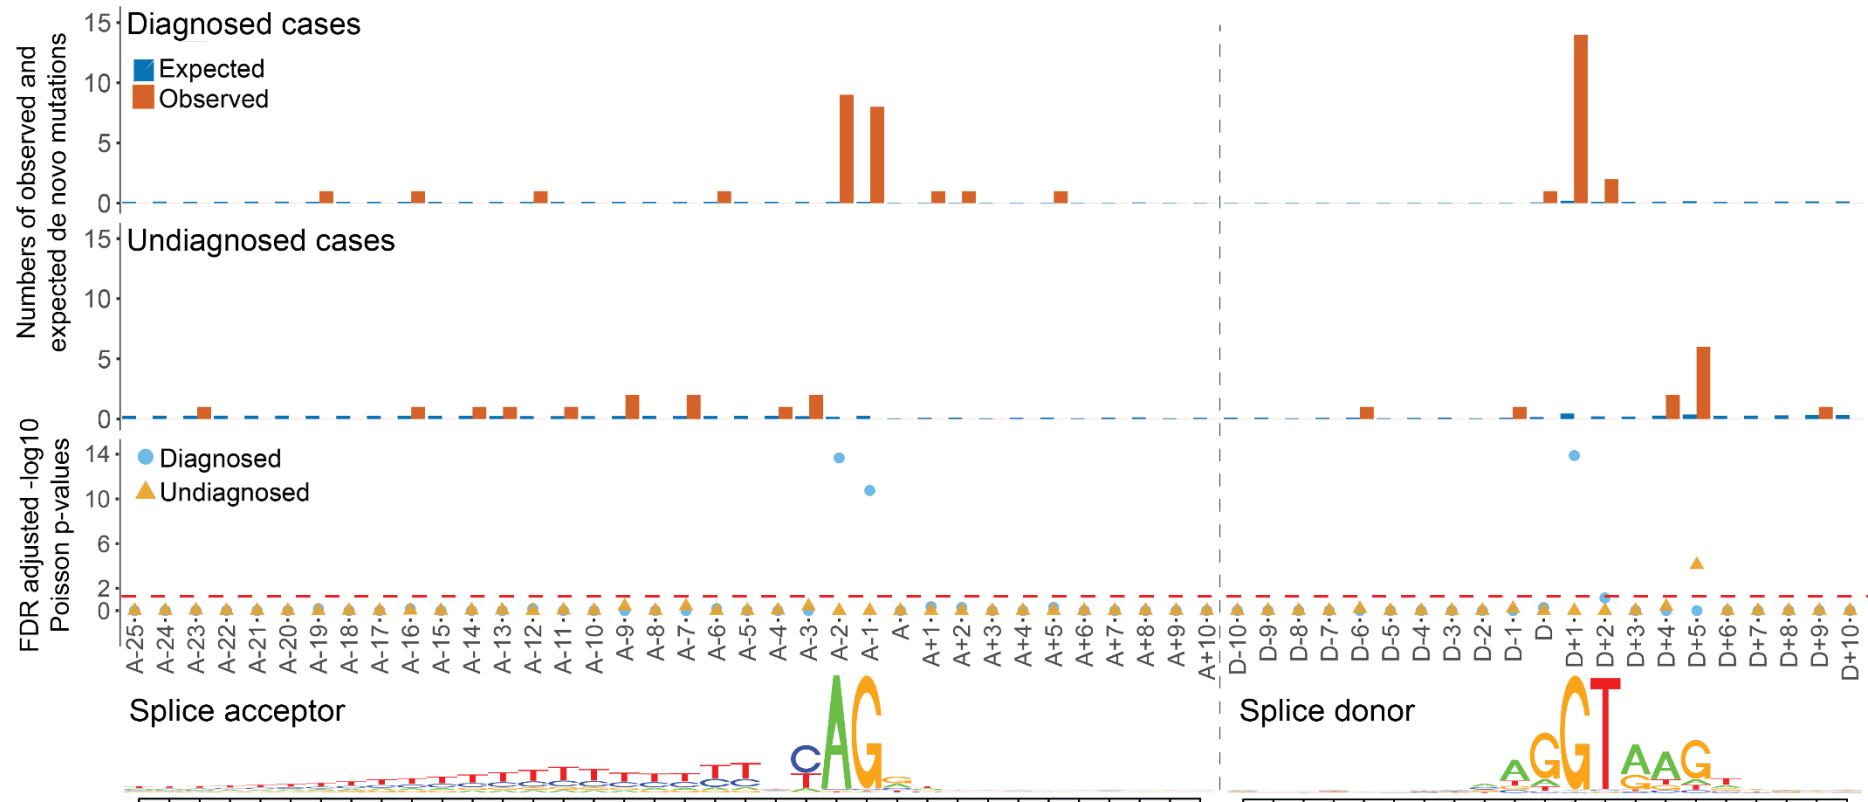

**Supplemental Fig. S3 – Relationship between positive predictive values and population genetics metrics**

Relationship between calculated positive predictive values (PPVs) for classes of splice and non-splice mutations, based on enrichment of DNMs, with population based metrics MAPS and 95% CI (in DDD unaffected parents and ExAC data) and proportion (with 95% CI) of unaffected DDD parental variants in high pLI genes ( $pLI > 0.9$ )

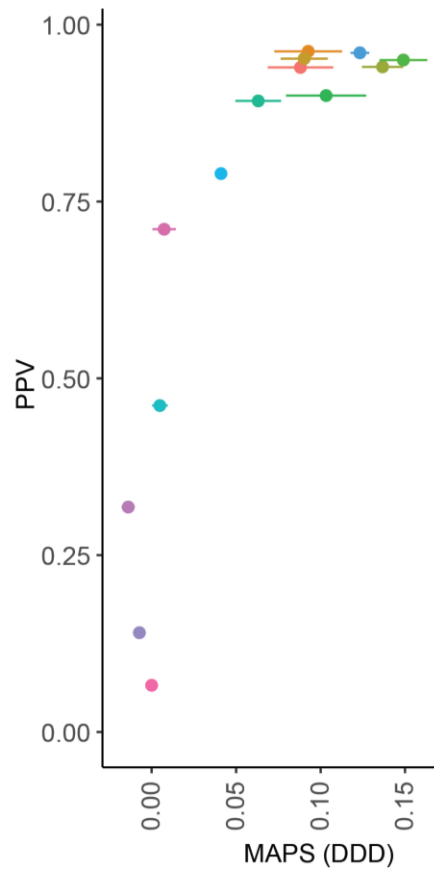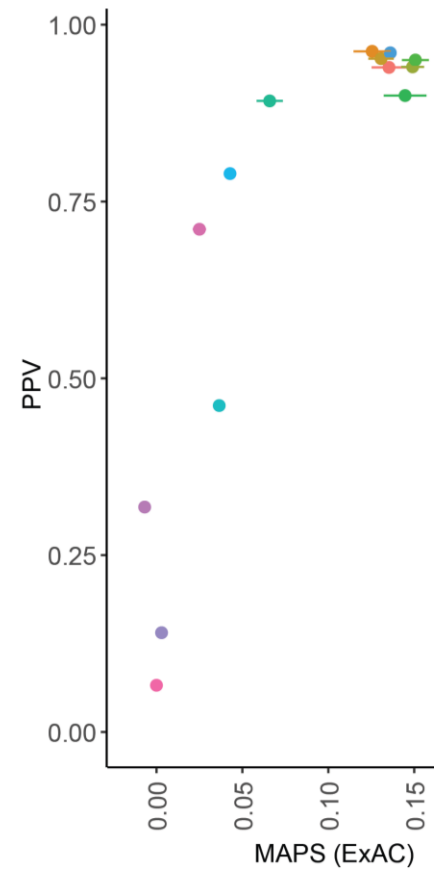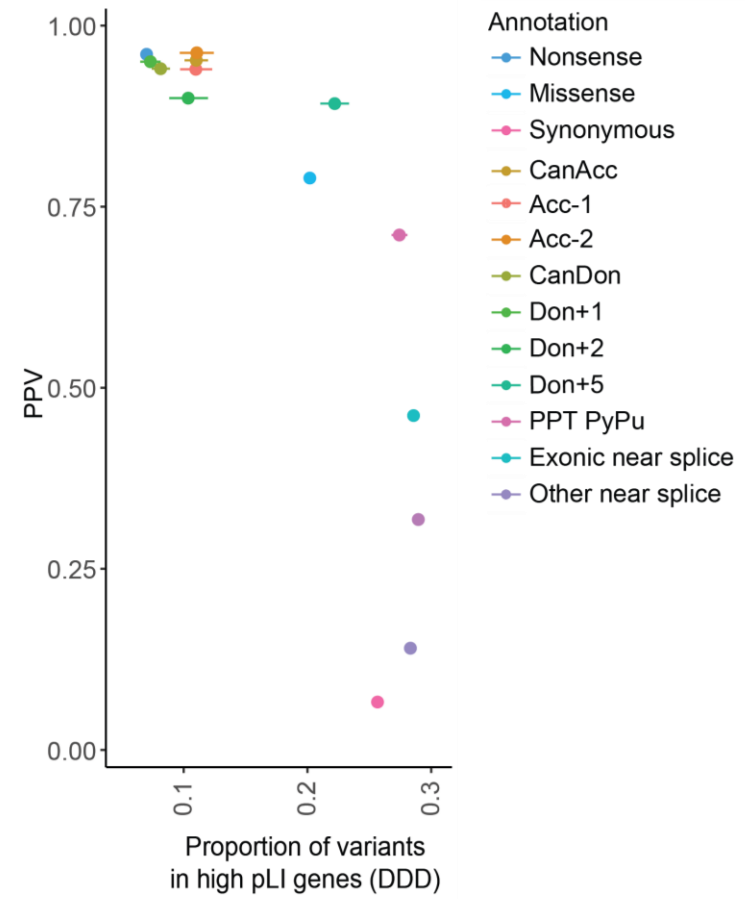

**Supplemental Table S1 - *De novo* mutations in non-canonical near splice positions not thought to be diagnostic**

Genomic coordinates and annotations of 20 *de novo* splice region variants identified in undiagnosed DDD probands in known dominant DD-associated genes, deemed unlikely to be diagnostic based on lack of phenotypic match between proband and associated syndrome (hg19 coordinates)

| Variant            | Gene           | VEP annotation        | Splice Annotation | Clinical classification |
|--------------------|----------------|-----------------------|-------------------|-------------------------|
| 18:42618432_G/T    | <i>SETBP1</i>  | intron_variant        | acc-18            | Likely benign           |
| 3:38988415_AC/A    | <i>SCN11A</i>  | intron_variant        | acc-17            | Likely benign           |
| 17:38240072_A/G    | <i>THRA</i>    | intron_variant        | acc-16            | Likely benign           |
| 19:13387958_G/A    | <i>CACNA1A</i> | intron_variant        | acc-16            | Likely benign           |
| 3:189456422_A/G    | <i>TP63</i>    | intron_variant        | acc-9             | Likely benign           |
| 1:7309543_GTTT/GTT | <i>CAMTA1</i>  | splice_region_variant | acc-8             | Likely benign           |
| 16:30745810_C/G    | <i>SRCAP</i>   | splice_region_variant | acc-7             | Likely benign           |
| 16:29816431_G/A    | <i>KIF22</i>   | splice_region_variant | acc-5             | Likely benign           |
| 22:41543944_C/T    | <i>EP300</i>   | synonymous_variant    | don-6             | Likely benign           |
| 10:94381235_G/T    | <i>KIF11</i>   | splice_region_variant | don+5             | Likely benign           |
| 16:2129206_G/A     | <i>TSC2</i>    | intron_variant        | don+9             | Likely benign           |
| 2:158594942_G/T    | <i>ACVR1</i>   | intron_variant        | don+10            | Likely benign           |
| 19:50912018_C/T    | <i>POLD1</i>   | synonymous_variant    | acc-24            | Uncertain               |
| 3:41266439_T/G     | <i>CTNNB1</i>  | splice_region_variant | acc-6             | Uncertain               |
| 17:44159911_GC/G   | <i>KANSL1</i>  | splice_region_variant | acc-3             | Uncertain               |
| 3:71021701_C/T     | <i>FOXP1</i>   | splice_region_variant | don+5             | Uncertain               |
| 6:157431700_G/A    | <i>ARID1B</i>  | splice_region_variant | don+5             | Uncertain               |
| X:41196724_T/G     | <i>DDX3X</i>   | splice_region_variant | don+6             | Uncertain               |
| 3:111366523_A/C    | <i>CD96</i>    | intron_variant        | don+10            | Uncertain               |
| 8:117869033_G/C    | <i>RAD21</i>   | intron_variant        | acc-23            | Uncertain               |

**Supplemental Table S2** - Phenotypic data on probands with likely diagnostic near-splice *de novo* mutations (DNMs) (hg19 coordinates)

\*HPO = Human Phenotype Ontology

| chrom:pos_ref/alt | symbol         | Splice annotation | HPO* terms                                                                                                                                                                                                                                     | HPO* terms (translation)                                                                                                                                                                                                                                                                                                                                                                                                                                                                                                 |
|-------------------|----------------|-------------------|------------------------------------------------------------------------------------------------------------------------------------------------------------------------------------------------------------------------------------------------|--------------------------------------------------------------------------------------------------------------------------------------------------------------------------------------------------------------------------------------------------------------------------------------------------------------------------------------------------------------------------------------------------------------------------------------------------------------------------------------------------------------------------|
| 7:42063221_G/C    | <i>GLI3</i>    | Acc-14            | HP:0001841, HP:0010709, HP:0011304                                                                                                                                                                                                             | 2-4 finger syndactyly, Broad thumb, Preaxial foot polydactyly                                                                                                                                                                                                                                                                                                                                                                                                                                                            |
| 16:3819367_C/T    | <i>CREBBP</i>  | Acc-13            | HP:0000028, HP:0000179, HP:0000248, HP:0000252, HP:0000347, HP:0000486, HP:0001263, HP:0001510, HP:0001831, HP:0002019, HP:0002205, HP:0004691, HP:0011304                                                                                     | 2-3 toe syndactyly, Brachycephaly, Broad thumbs, Constipation, Cryptorchidism, Global developmental delay, Growth delay, Microcephaly, Micrognathia, Recurrent respiratory infections, Short toes, Strabismus, Thick lower lip vermillion                                                                                                                                                                                                                                                                                |
| 22:24143120_T/G   | <i>SMARCB1</i> | Acc-11            | HP:0000294, HP:0000680, HP:0000696, HP:0000750, HP:0001263, HP:0001763, HP:0001999, HP:0002205, HP:0002213, HP:0007021, HP:0007096, HP:0010830, HP:0010877, HP:0100543, HP:0003045, HP:0002926, HP:0000708, HP:0000545, HP:0002164, HP:0001212 | Unilateral strabismus, Delayed eruption of permanent teeth, Delayed eruption of primary teeth, Delayed speech and language development, Global developmental delay, Cognitive impairment, Impaired tactile sensation, Pain insensitivity, Pes planus, Recurrent respiratory infections, Fine hair, Low anterior hairline, Abnormal facial shape, Hypoplasia of the optic tract, Abnormality of the patella, Abnormality of thyroid physiology, Behavioural abnormality, Myopia, Nail dysplasia, Prominent fingertip pads |
| 18:52895603_T/C   | <i>TCF4</i>    | Acc-11            | HP:0000122, HP:0000252, HP:0000545, HP:0000646, HP:0001263, HP:0001999                                                                                                                                                                         | Abnormal facial shape, Amblyopia, Global developmental delay, Microcephaly, Myopia, Unilateral renal agenesis                                                                                                                                                                                                                                                                                                                                                                                                            |
| 5:88025173_A/C    | <i>MEF2C</i>   | Acc-9             | HP:0000179, HP:0001250, HP:0002500, HP:0006579, HP:0011344, HP:0100023                                                                                                                                                                         | Abnormality of the cerebral white matter, Prolonged neonatal jaundice, Recurrent hand flapping, Seizures, Severe global developmental delay, Thick lower lip vermillion                                                                                                                                                                                                                                                                                                                                                  |
| 9:130988306_G/A   | <i>DNM1</i>    | Acc-8             | HP:0001250, HP:0001263, HP:0001319, HP:0009117, HP:0011228, HP:0011344, HP:0011947                                                                                                                                                             | Aplasia/Hypoplasia of the maxilla, Global developmental delay, Horizontal eyebrow, Neonatal hypotonia, Respiratory tract infection, Seizures, Severe global developmental delay                                                                                                                                                                                                                                                                                                                                          |
| 8:61763045_G/A    | <i>CHD7</i>    | Acc-7             | HP:0000185, HP:0000202, HP:0000589, HP:0001263, HP:0002564, HP:0003508, HP:0011678                                                                                                                                                             | Cleft soft palate, Coloboma, Global developmental delay, Oral cleft, Proportionate short stature, Tetralogy of Fallot with pulmonary atresia and major aortopulmonary collateral arteries, obsolete Malformation of the heart and great vessels                                                                                                                                                                                                                                                                          |
| 17:38801875_T/C   | <i>SMARCE1</i> | Acc-4             | HP:0000750, HP:0004322, HP:0005484                                                                                                                                                                                                             | Delayed speech and language development, Postnatal microcephaly, Short stature                                                                                                                                                                                                                                                                                                                                                                                                                                           |
| 1:27097607_C/A    | <i>ARID1A</i>  | Acc-3             | HP:0000179, HP:0000347, HP:0000364, HP:0000369, HP:0000377, HP:0000490, HP:0000973, HP:0001338, HP:0001511, HP:0008935                                                                                                                         | Abnormality of the pinna, Cutis laxa, Deeply set eye, Generalized neonatal hypotonia, Hearing abnormality, Intrauterine growth retardation, Low-set ears, Micrognathia, Partial agenesis of the corpus callosum, Thick lower lip vermillion                                                                                                                                                                                                                                                                              |
| 9:140728798_C/G   | <i>EHMT1</i>   | Acc-3             | HP:0002558, HP:0002020, HP:0002021, HP:0012716, HP:0008915, HP:0000248, HP:0030812, HP:0001800, HP:0012433, HP:0100543, HP:0000750, HP:0040082, HP:0010864, HP:0005100                                                                         | Supernumerary nipple, Gastroesophageal reflux, Pyloric stenosis, Moderate conductive hearing impairment, Truncal obesity, Brachycephaly, Enlarged tonsils, Hypoplastic toenails, Abnormal social behaviour, Cognitive impairment, Delayed speech and language development, Happy demeanor, Intellectual disability, severe, Premature birth following premature rupture of fetal membranes                                                                                                                               |



|                 |               |       |                                                                                                                                                                                                                        |                                                                                                                                                                                                                                                                                                                                                                           |
|-----------------|---------------|-------|------------------------------------------------------------------------------------------------------------------------------------------------------------------------------------------------------------------------|---------------------------------------------------------------------------------------------------------------------------------------------------------------------------------------------------------------------------------------------------------------------------------------------------------------------------------------------------------------------------|
| 2:223160248_T/C | <i>PAX3</i>   | Don-1 | HP:0000218, HP:0000316, HP:0000460, HP:0000527, HP:0000581, HP:0000582, HP:0002829, HP:0007429, HP:0007603, HP:0009889, HP:0000426, HP:0008573, HP:0000579, HP:0000402                                                 | Arthralgia, Blepharophimosis, Few cafe-au-lait spots, Freckles in sun-exposed areas, High palate, Hypertelorism, Localized hirsutism, Long eyelashes, Narrow nose, Upslanted palpebral fissure, High nasal bridge, Low-frequency sensorineural hearing impairment, Lacrimal duct obstruction, Narrow ear canal                                                            |
| 2:166229861_A/G | <i>SCN2A</i>  | Don+4 | HP:0000717, HP:0001344, HP:0002342, HP:0001250                                                                                                                                                                         | Absent speech, Autism, Intellectual disability, moderate, Seizures                                                                                                                                                                                                                                                                                                        |
| 9:130422391_A/G | <i>STXBP1</i> | Don+4 | HP:0001048, HP:0001252, HP:0002599, HP:0011344                                                                                                                                                                         | Cavernous hemangioma, Head titubation, Muscular hypotonia, Severe global developmental delay                                                                                                                                                                                                                                                                              |
| 22:41556731_G/A | <i>EP300</i>  | Don+5 | HP:0000023, HP:0000213, HP:0000220, HP:0000322, HP:0000369, HP:0000414, HP:0000486, HP:0000490, HP:0000527, HP:0001263, HP:0001537, HP:0001771, HP:0005484, HP:0007993, HP:0008551, HP:0008850, HP:0100023, HP:0000717 | Achilles tendon contracture, Bulbous nose, Deeply set eye, Global developmental delay, Inguinal hernia, Long eyelashes, Low-set ears, Malformed lacrimal ducts, Microtia, Postnatal microcephaly, Recurrent hand flapping, Severe postnatal growth retardation, Short philtrum, Strabismus, Thin vermilion border, Umbilical hernia, Velopharyngeal insufficiency, Autism |
| 2:149221493_G/C | <i>MBD5</i>   | Don+5 | HP:0000252, HP:0000664, HP:0001601, HP:0002020                                                                                                                                                                         | Gastroesophageal reflux, Laryngomalacia, Microcephaly, Synophrys                                                                                                                                                                                                                                                                                                          |
| 9:130427615_G/C | <i>STXBP1</i> | Don+5 | HP:0000733, HP:0002066, HP:0002378, HP:0002943, HP:0003763, HP:0007359, HP:0010864                                                                                                                                     | Bruxism, Focal seizures, Gait ataxia, Hand tremor, Intellectual disability, severe, Stereotypy, Thoracic scoliosis                                                                                                                                                                                                                                                        |
| 17:42956919_C/T | <i>EFTUD2</i> | Don+5 | HP:0000253, HP:0000286, HP:0000384, HP:0000396, HP:0000412, HP:0011343                                                                                                                                                 | Epicanthus, Moderate global developmental delay, Overfolded helix, Preauricular skin tag, Progressive microcephaly, Protruding ear                                                                                                                                                                                                                                        |
| 20:61452890_C/G | <i>COL9A3</i> | Don+8 | HP:0000729, HP:0000750, HP:0010529, HP:0000735, HP:0001382, HP:0008947, HP:0000736, HP:0000733                                                                                                                         | Autistic behavior, Delayed speech and language development, Echolalia, Impaired social interactions, Joint hypermobility, Muscular hypotonia, Short attention span, Stereotypy                                                                                                                                                                                            |

**Supplemental Table S3** – Splicing pathogenicity scores for near-splice *de novo* SNVs (hg19 coordinates)

| chrom:pos_ref/alt | Symbol         | Splice Annotation | AdaBoost | Random Forest | MES (Percent difference) | Spidex (dpsi_max_tissue) | CADD    | Likely diagnostic |
|-------------------|----------------|-------------------|----------|---------------|--------------------------|--------------------------|---------|-------------------|
| 7:42063221_G/C    | <i>GLI3</i>    | acc-14            | NA       | NA            | -24.4305                 | 0.2226                   | 0.2030  | Yes               |
| 16:3819367_C/T    | <i>CREBBP</i>  | acc-13            | NA       | NA            | -45.4327                 | NA                       | 7.8700  | Yes               |
| 22:24143120_T/G   | <i>SMARCB1</i> | acc-11            | 0.0975   | 0.3360        | -20.8763                 | -6.2151                  | 7.3290  | Yes               |
| 18:52895603_T/C   | <i>TCF4</i>    | acc-11            | 0.9979   | 0.8400        | -44.9511                 | -0.6026                  | 7.7960  | Yes               |
| 5:88025173_A/C    | <i>MEF2C</i>   | acc-9             | 0.9999   | 0.9560        | -110.2334                | -0.2806                  | 11.1000 | Yes               |
| 9:130988306_G/A   | <i>DNM1</i>    | acc-8             | 0.0195   | 0.0340        | -80.8843                 | -1.1322                  | 19.1500 | Yes               |
| 8:61763045_G/A    | <i>CHD7</i>    | acc-7             | 0.9358   | NA            | -130.4054                | 0.1808                   | 12.9000 | Yes               |
| 17:38801875_T/C   | <i>SMARCE1</i> | acc-4             | 0.9770   | 0.6580        | -29.4053                 | -1.0875                  | 8.6300  | Yes               |
| 1:27097607_C/A    | <i>ARID1A</i>  | acc-3             | 0.9100   | 0.8040        | -31.3699                 | NA                       | 14.4500 | Yes               |
| 9:140728798_C/G   | <i>EHMT1</i>   | acc-3             | 0.9998   | 0.9640        | -123.7713                | -14.8679                 | 5.4730  | Yes               |
| 2:223160248_T/C   | <i>PAX3</i>    | don-1             | 0.9999   | 1.0000        | -47.5131                 | -2.7475                  | 19.7300 | Yes               |
| 2:166229861_A/G   | <i>SCN2A</i>   | don+4             | 0.9679   | 0.7120        | -29.9674                 | -4.8629                  | 15.2500 | Yes               |
| 9:130422391_A/G   | <i>STXBP1</i>  | don+4             | 0.9997   | 0.9700        | -75.3149                 | -6.3753                  | 16.8100 | Yes               |
| 9:130427615_G/C   | <i>STXBP1</i>  | don+5             | 0.9980   | 0.8900        | -20.8484                 | -2.0404                  | 15.3600 | Yes               |
| 17:42956919_C/T   | <i>EFTUD2</i>  | don+5             | 1.0000   | 0.9540        | -90.4161                 | -0.8542                  | 17.6400 | Yes               |
| 22:41556731_G/A   | <i>EP300</i>   | don+5             | 0.9997   | 0.9720        | -95.9032                 | -18.9583                 | 15.7000 | Yes               |
| 2:149221493_G/C   | <i>MBD5</i>    | don+5             | 1.0000   | 0.9980        | -78.8978                 | -1.3005                  | 13.6300 | Yes               |
| 20:61452890_C/G   | <i>COL9A3</i>  | don+8             | 0.0004   | 0.0140        | NA                       | -2.7056                  | 5.6440  | Yes               |
| 19:50912018_C/T   | <i>POLD1</i>   | acc-24            | NA       | NA            | NA                       | -0.1984                  | 5.0910  | No                |
| 8:117869033_G/C   | <i>RAD21</i>   | acc-23            | NA       | NA            | NA                       | -0.6527                  | 3.1330  | No                |
| 18:42618432_G/T   | <i>SETBP1</i>  | acc-18            | NA       | NA            | 11.7216                  | NA                       | 4.8110  | No                |
| 17:38240072_A/G   | <i>THRA</i>    | acc-16            | NA       | NA            | 16.0602                  | 0.1011                   | 8.4540  | No                |
| 19:13387958_G/A   | <i>CACNA1A</i> | acc-16            | NA       | NA            | -1.6273                  | -0.3749                  | 3.1510  | No                |
| 3:189456422_A/G   | <i>TP63</i>    | acc-9             | 0.0000   | 0.0040        | 18.4615                  | -0.0061                  | 0.9540  | No                |
| 16:30745810_C/G   | <i>SRCAP</i>   | acc-7             | 0.0768   | 0.4380        | -29.3853                 | -1.4174                  | 10.1000 | No                |
| 3:41266439_T/G    | <i>CTNNB1</i>  | acc-6             | 0.9817   | 0.6700        | -58.3691                 | 0.5724                   | 7.3830  | No                |

|                 |               |        |        |        |          |          |         |    |
|-----------------|---------------|--------|--------|--------|----------|----------|---------|----|
| 16:29816431_G/A | <i>KIF22</i>  | acc-5  | 0.0008 | 0.0300 | -2.5510  | -0.9766  | 11.8200 | No |
| 22:41543944_C/T | <i>EP300</i>  | don-6  | NA     | NA     | NA       | -0.8986  | 13.8500 | No |
| 3:71021701_C/T  | <i>FOXP1</i>  | don+5  | 0.0648 | 0.1140 | -82.0779 | -3.0711  | 16.7400 | No |
| 10:94381235_G/T | <i>KIF11</i>  | don+5  | 0.7600 | 0.6240 | -33.5208 | -0.1237  | 9.7980  | No |
| 6:157431700_G/A | <i>ARID1B</i> | don+5  | 0.9999 | 0.9840 | -72.7838 | -13.1815 | 13.2600 | No |
| X:41196724_T/G  | <i>DDX3X</i>  | don+6  | 0.9727 | 0.8920 | -48.2911 | NA       | 14.3800 | No |
| 16:2129206_G/A  | <i>TSC2</i>   | don+9  | NA     | NA     | NA       | 1.6113   | 2.2320  | No |
| 2:158594942_G/T | <i>ACVR1</i>  | don+10 | NA     | NA     | NA       | -0.0722  | 3.6330  | No |
| 3:111366523_A/C | <i>CD96</i>   | don+10 | NA     | NA     | NA       | 0.1223   | 9.3260  | No |

**Supplemental Fig. S4 – Outcomes of minigene assays for splicing validations.**

A – schematic diagram of splicing construct for PolyPy variants, plus experimental outcome for five PolyPy variants that generated altered splicing products (all generated a cryptic splice site upstream of the CSS, causing retention of part of the intron (in four instances leading to a frameshift effect, and in one leading to the inclusion of two additional amino acids in the protein sequence). B – schematic diagram of splicing construct for don+5 mutation, plus experimental outcome for don+5 mutation, which caused the utilisation of a second “GT” site within the reference sequence as a splice donor site, causing retention of intronic sequence and leading to a frameshift effect. C – validation outcomes for PolyPy DNMs that were not found to affect splicing. D – validation outcomes for parental variants selected as negative controls. NB - For the *CHD7* variant, two splice products were observed, corresponding to the expected (wild type) splicing and the retention of 5bp intronic sequence. The *MBD5* variant gave multiple splice isoforms, with retention of 12bp intronic sequence being the most prevalent, but normally spliced, 19bp intronic retention, and complete intron retention also observed. This figure shows the predominant isoform observed for these variants.

A. Schematic diagram of splicing construct for polypyrimidine tract variants

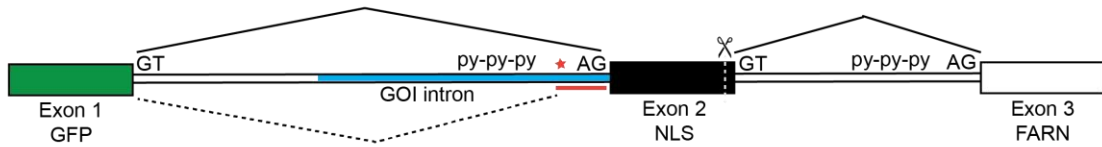

Validation outcomes for polypyrimidine tract variants found to affect splicing

**DNM1**

Construct sequences (intron, exon)

Ref CCTGTCCCCACCTCCTCCCCGGGTGCAGGACGGGTCCGGACTCAGATCTGG  
 Alt CCTGTCCCCACCTCCTCCCCAGGTGCAGGACGGGTCCGGACTCAGATCTGG

Predicted protein outcome

... Exon 9 Exon 10 ...  
 ATT AGG ACG GGC CTC TTC / 1377 N / TAA  
 Ile Arg Thr Gly Leu Phe / 459 aa / . (864aa)  
 ... Exon 9 Intron 9/10 Exon 10 ...  
 ATT AGG TGC AGG ACG GGC CTC TTC / 1377 N / TAA  
 Ile Arg Cys Arg Thr Gly Leu Phe / 459 aa / . (866aa)

cDNA sequence traces

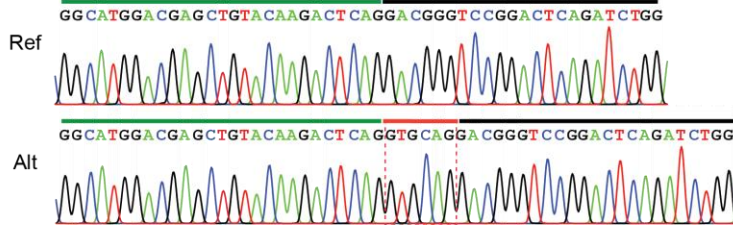

**GLI3**

Construct sequences (intron, exon)

Ref TCTGTTCCCTGCCCCACCTCTTCTTTCAGGAACAGTCCGGACTCAGATC  
 Alt TCTGTTCCCTGCCCCACCTCTTCTTTCAGGAACAGTCCGGACTCAGATC

Predicted protein outcome

... Exon 9 Exon 10 ...  
 CAG CAG GAA CAG CCC GAA GGA / 3369 N / TAG  
 Gln Gln Glu Gln Pro Glu Gly / 1123 aa / . (1580aa)  
 ... Exon 9 Intron 9/10 Exon 10 ...  
 CAG CAG CCT CTT CTT TCA GGA ACA / 42 N / TGA  
 Gln Gln Pro Leu Leu Ser Gly Thr / 14 aa / . (472aa)

cDNA sequence traces

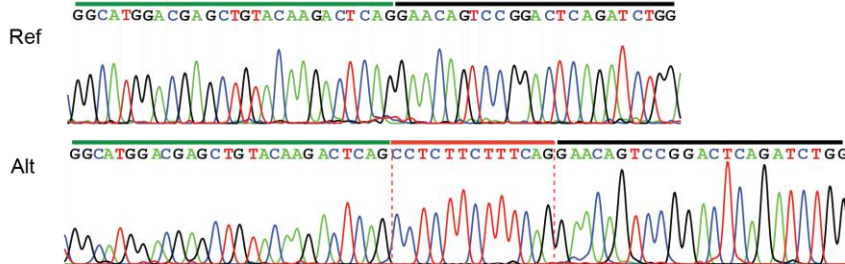

**CHD7**

Construct sequences (intron, exon)

Ref TTCTGTGCACGGATGGGCACGGCACAGGCATGTCCGGACTCAGATCTGGA  
 Alt TTCTGTGCACGGATGGGCACAGCACAGGCATGTCCGGACTCAGATCTGGA

Predicted protein outcome

... Exon 25 Exon 26 ...  
 AAA CAT GGC TAT GAG AAG TAC / 3573 N / TAA  
 Lys His Gly Tyr Glu Lys Tyr / 1191 aa / . (2997aa)  
 ... Exon 25 Intron 25/26 Exon 26 ...  
 AAA CAT GCA CAG GCT ATG AGA AGT / 69 N / TAG  
 Lys His Ala Gln Ala Met Arg Ser / 23 aa / . (1830aa)

cDNA sequence traces

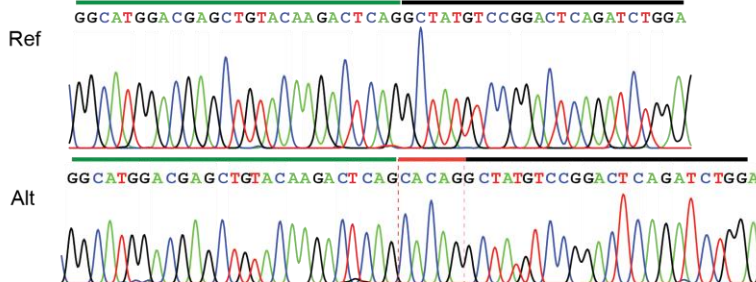

Key

- █ Exon 1
- █ Intron 1
- █ Retained intron 1
- █ Exon 2
- N Ref nucleotide
- n Alt nucleotide
- Acceptor/donor
- ✂ Self cleaving peptide
- ..... GOI codons

Validation outcomes for polypyrimidine tract variants found to affect splicing (continued)

**CREBBP**

Construct sequences (intron, exon)

Predicted protein outcome

Ref TTACTGAAGTCAGTGCCTTCGGTTTTTTCACAGCTTTCCCTCCGGACTCAGAT  
 Alt TTACTGAAGTCAGTGCCTTCAGTTTTTTCACAGCTTTCCCTCCGGACTCAGAT

... Exon 14 CTT TCC CAG GCA GCA GCC / 4428N / TAG  
 Thr Pro Leu Ser Gln Ala Ala Ala / 1476aa / . (2442aa)

... Exon 14 Intron 14/15 Exon 15  
 ... ACA CCG TTT TTT CAC AG C TTT CCC / 102 N / TGA  
 Thr Pro Phe Phe His Ser Phe Pro / 34 aa / . (1000aa)

cDNA sequence traces

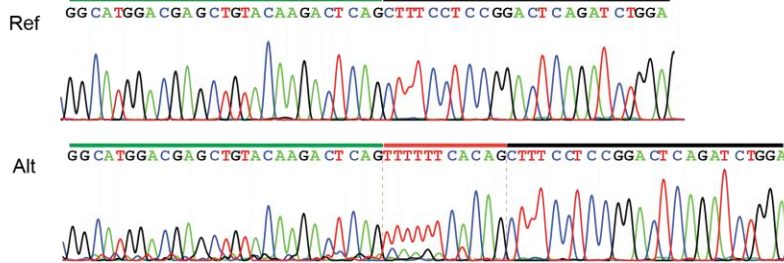

**MEF2C**

Construct sequences (intron, exon)

Predicted protein outcome

Ref CAGTAATGCTTTTTATTATTTTAAAGAATCAATCCGGACTCAGAT  
 Alt CAGTAATGCTTTTTATTAGTTTAAAGAATCAATCCGGACTCAGAT

... Exon 9 TCA GTG AAT CAA AGG ATA AAT AAC / 471N / TGA  
 Ser Val Asn Gln Arg Ile Asn Asn / 157aa / . (483aa)

... Exon 9 Intron 9/10 Exon 10  
 ... TCA GTG TTT AAA AG A ATC AAA GGA TAA  
 Ser Val Phe Lys Arg Ile Lys Gly . (294aa)

cDNA sequence traces

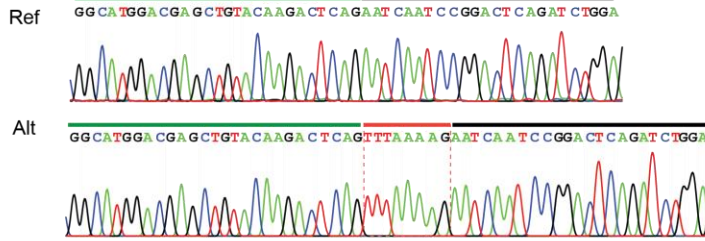

B. Schematic diagram of splicing construct for don+5 variant

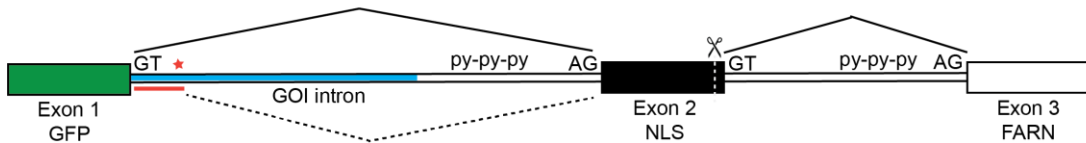

Validation outcomes for don+5 variant found to affect splicing

**MBD5**

Construct sequences (exon, intron)

Predicted protein outcome

Ref GCATGGACGAGCTGTACAAGGAACAAGTATGTAATATGGTGAAGGTTTCAG  
 Alt GCATGGACGAGCTGTACAAGGAACAAGTATCTAATATGGTGAAGGTTTCAG

... Exon 8 GGA ACA A AT GCA ACT CCA GTA GTA / 4074 N / TAA  
 Gly Thr Asn Ala Thr Pro Val Val / 1358 aa / . (1494aa)

... Exon 8 Intron 9/10 Exon 9  
 ... GGA ACA A GT ATC TAA TAT G AT GCA ...  
 Gly Thr Ser Ile . (134aa)

cDNA sequence traces

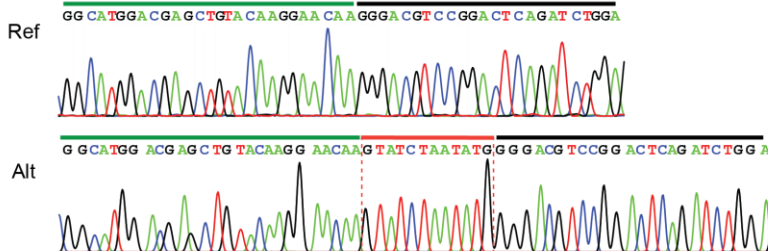

C. Validation outcomes for polypyrimidine tract variants that did not affect splicing

**CTNNB1**

Construct sequences (intron, exon)

Ref GTGAGTGTGAATTAACCTTTCCAGATATTGTCGGACTCAGATCTGGAGG

cDNA sequence traces

ggCATGGACGAGCTGTACAAGA CT CAGATATTGTCCGGA CT CAGATCTGGA

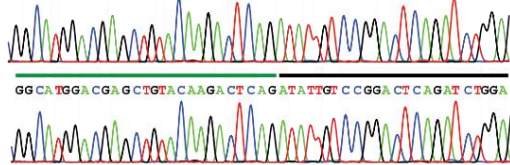

Alt GTGAGTGTGAATTAACCTTGTCCAGATATTGTCGGACTCAGATCTGGAGG

ggCATGGACGAGCTGTACAAGA CT CAGATATTGTCCGGA CT CAGATCTGGA

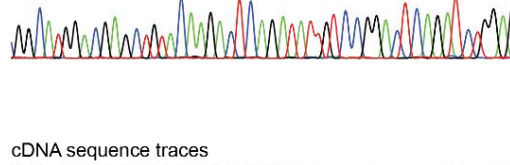

**SMARCB1**

Construct sequences (intron, exon)

Ref GACTGGGAGGACTTTTCTTGTATCTCCTCAGGAAACATCCGGACTCAGATC

cDNA sequence traces

ggCATGGACGAGCTGTACAAGA CT CAGGAAACATCCGGA CT CAGATCTGGA

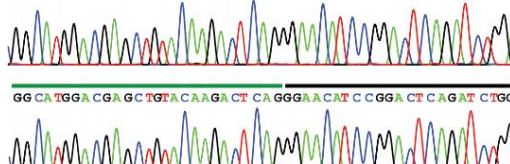

Alt GACTGGGAGGACTTTTCTTGTATCTCCTCAGGAAACATCCGGACTCAGATC

ggCATGGACGAGCTGTACAAGA CT CAGGAAACATCCGGA CT CAGATCTGGA

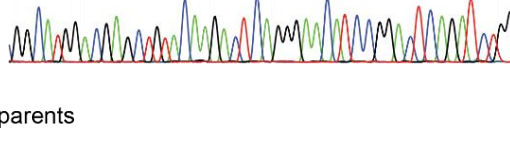

D. Validation outcomes for control variants in unaffected parents

**DNM1**

Construct sequences (intron, exon)

Ref CCTGTCCCACCTCCTCCCGGGTGCAGGACGGTCCGGACTCAGATCTGG

cDNA sequence traces

ggCATGGACGAGCTGTACAAGA CT CAGGACGGTCCGGA CT CAGATCTGG

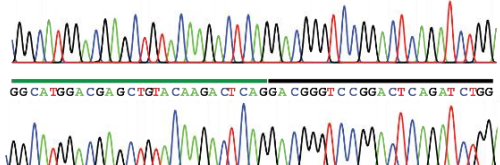

Alt CCTGTCCCACCTCCTCCCGGGTGCAGGACGGTCCGGACTCAGATCTGG

ggCATGGACGAGCTGTACAAGA CT CAGGACGGTCCGGA CT CAGATCTGG

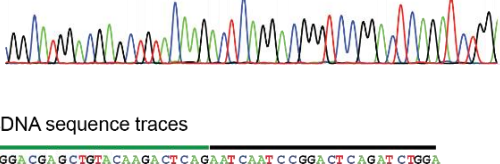

**MEF2C**

Construct sequences (intron, exon)

Ref CAGTAATGCTTTTATTATTTAAAGAATCAATCCGGACTCAGAT

cDNA sequence traces

ggCATGGACGAGCTGTACAAGA CT CAGAAATCAATCCGGA CT CAGATCTGGA

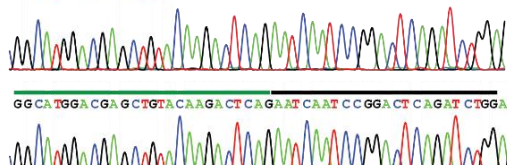

Alt CAGTAATGCTTTTATTATTTAAAGAATCAATCCGGACTCAGAT

ggCATGGACGAGCTGTACAAGA CT CAGAAATCAATCCGGA CT CAGATCTGGA

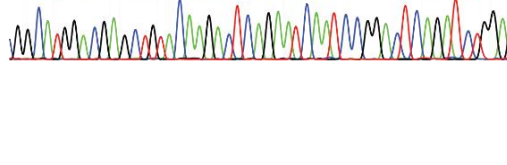

**Supplemental Fig. S5 – Proportion of parental variants in high pLI gene by pathogenicity score**

Proportion of variants (with 95% CI) in 13,750 unaffected parents of DDD probands which fall within genes with high pLI (>0.9) for pathogenicity score brackets (least to most severe), with Spearman correlation coefficient.



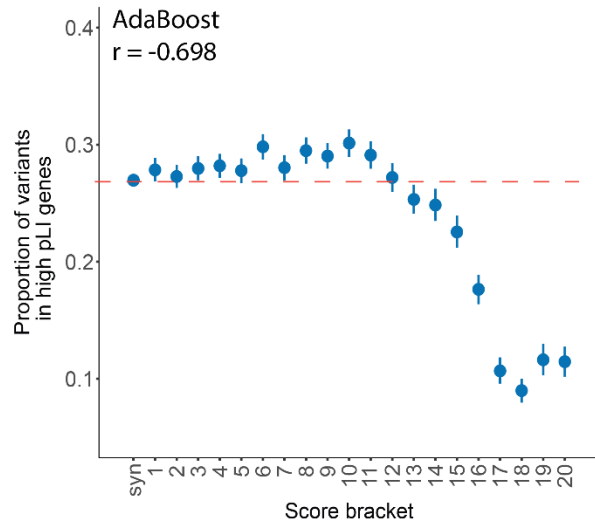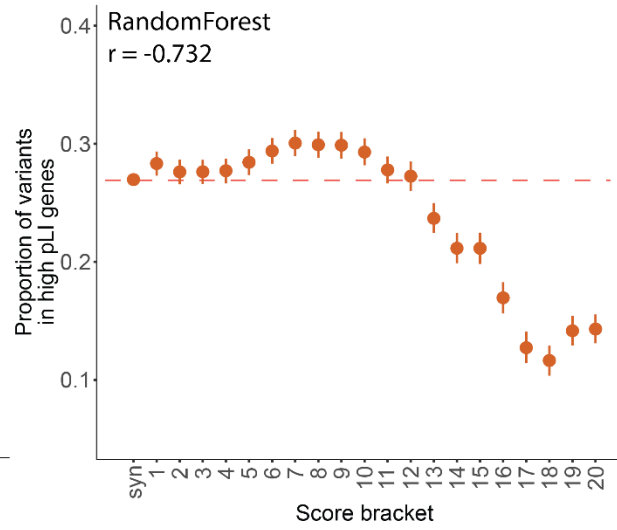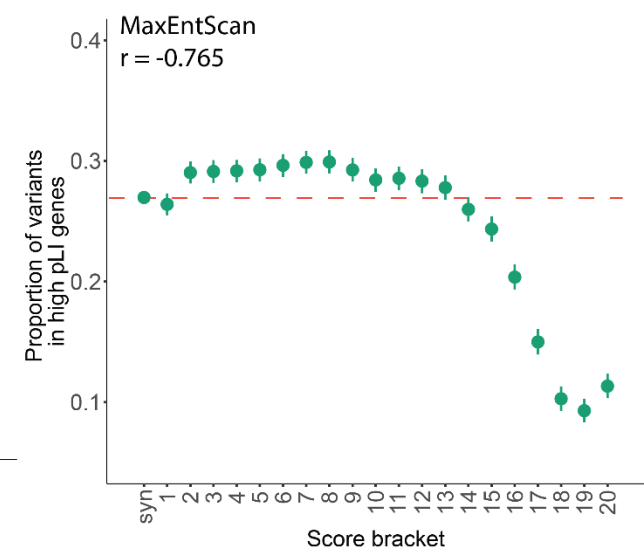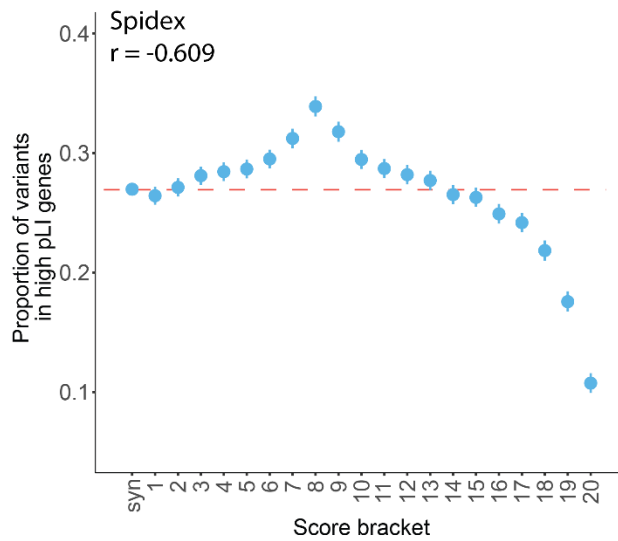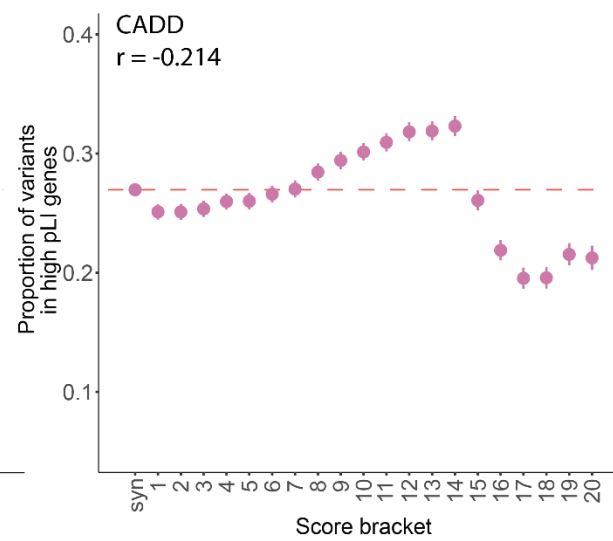

**Supplemental Fig. S6 – Mutability adjusted proportion of singletons by pathogenicity score, excluding canonical splice sites**

Mutability adjusted proportion of singletons (MAPS) with 95% CI calculated for pathogenicity score brackets (least to most severe), excluding canonical dinucleotide positions, in 13,750 unaffected parents from the DDD project, with Spearman correlation coefficient.

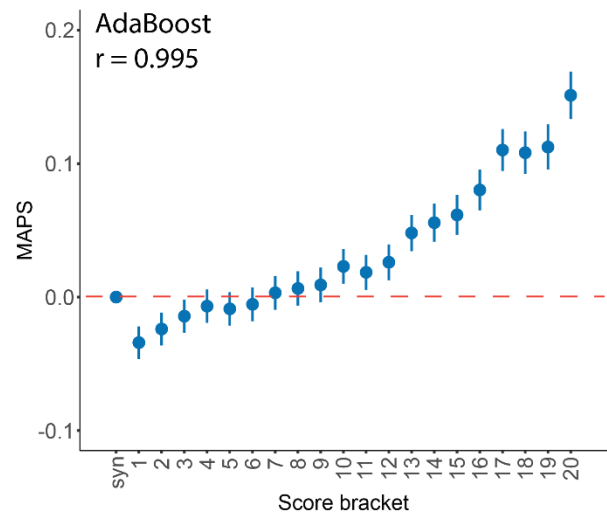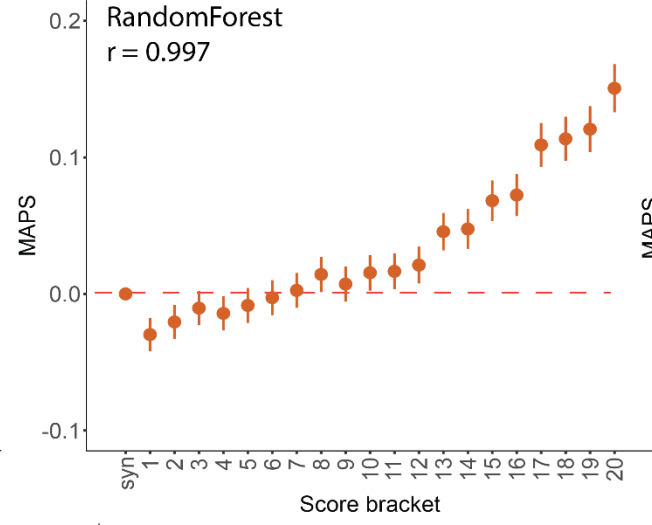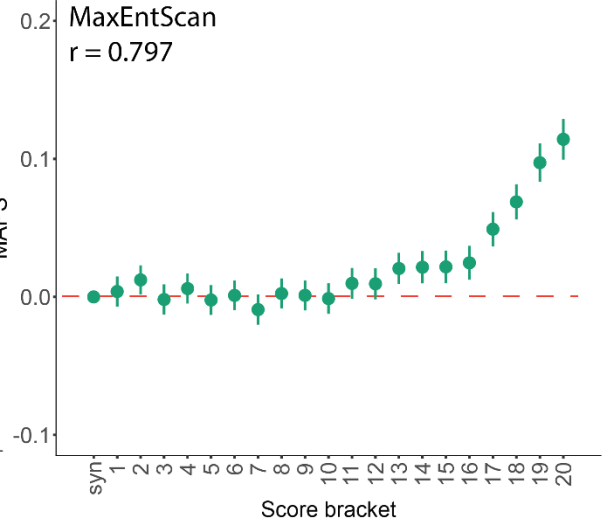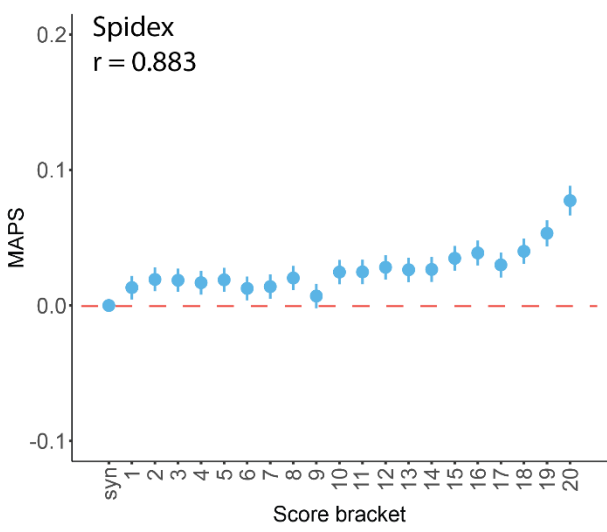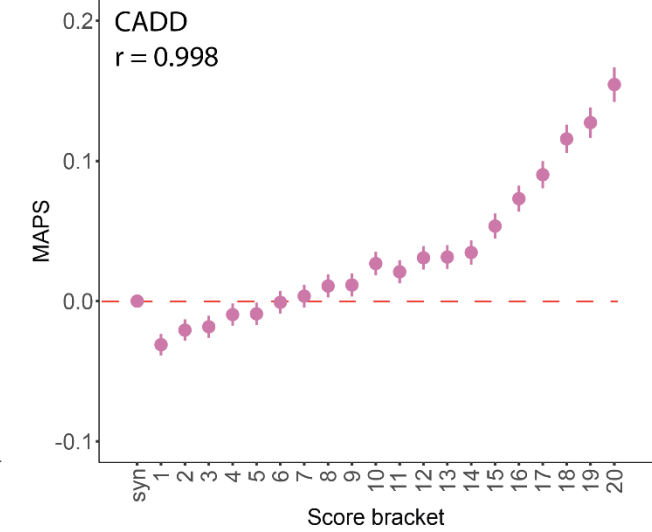

**Supplemental Fig. S7 – Proportion of parental variants in high pLI gene by pathogenicity score, excluding canonical splice sites**

Proportion (with 95% CI) of variants in 13,750 unaffected parents of DDD probands which fall within genes with high pLI (>0.9) for pathogenicity score brackets (least to most severe), excluding canonical dinucleotide positions, with Spearman correlation coefficient.

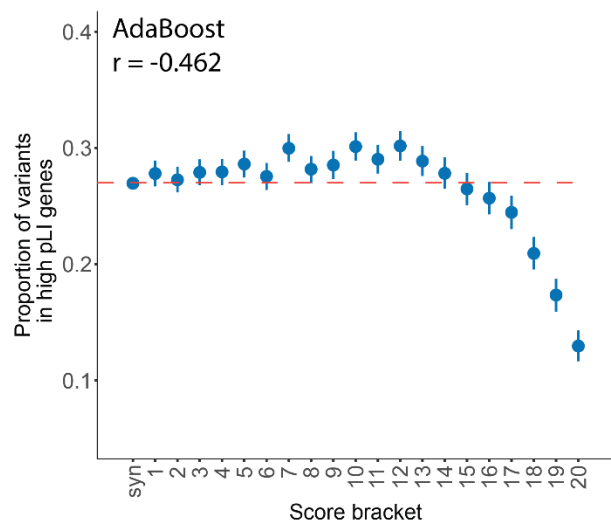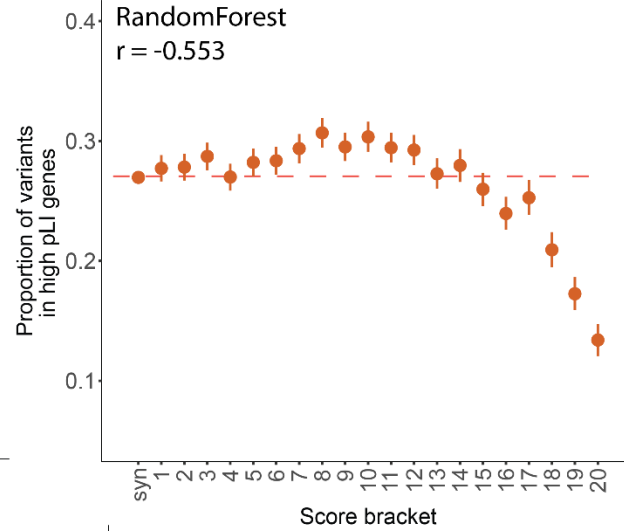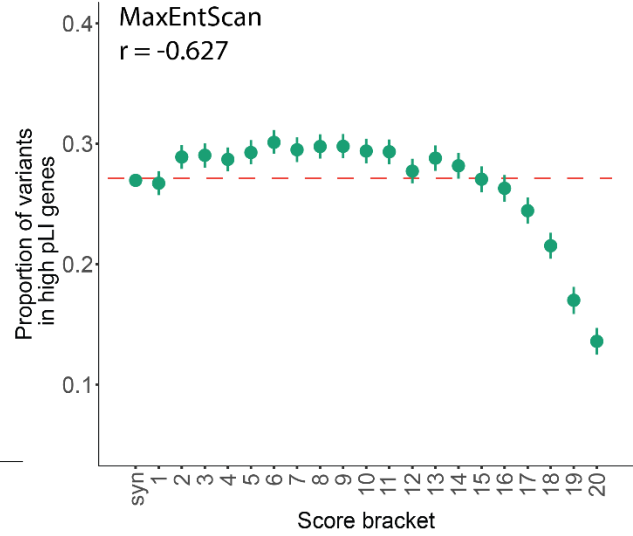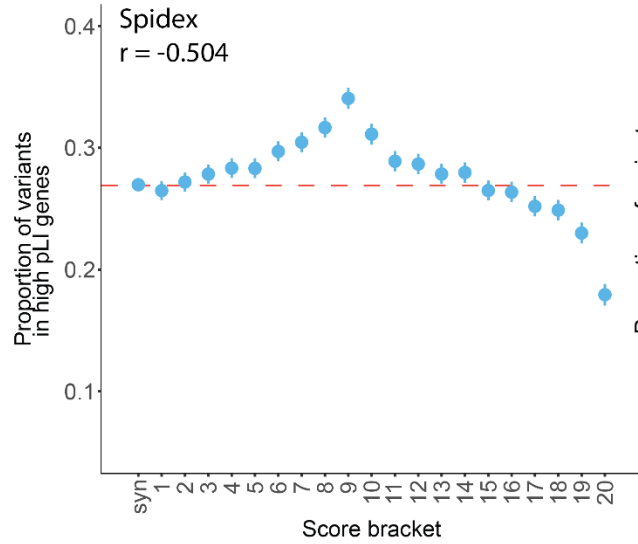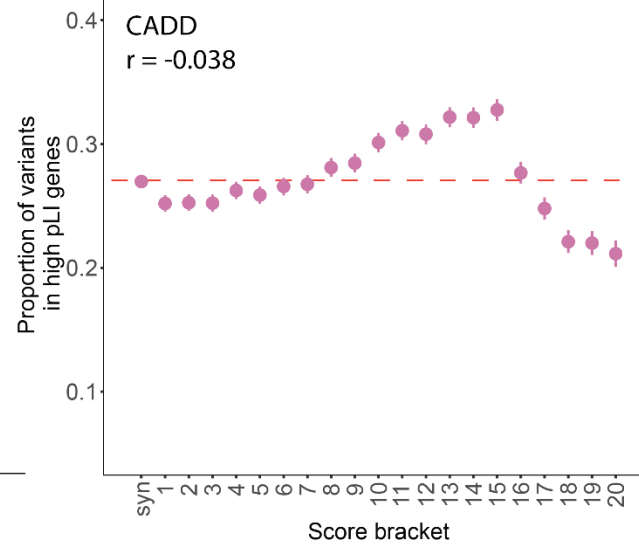

**Supplemental Table S5** – Details of variants selected for validation assay (hg19 coordinates)

| Gene of interest     | Variant                    | Intron | Splice annotation | Strand | Reason for validation         | Genomic region assayed | Minigene assay outcome                |
|----------------------|----------------------------|--------|-------------------|--------|-------------------------------|------------------------|---------------------------------------|
| <i>GLI3</i>          | 7:42063221_G/C             | 9-10   | acc -14           | -      | PolyPy likely pathogenic      | 7:42063202-42063393    | 13bp intron retention                 |
| <i>MEF2C</i>         | 5:88025173_A/C             | 8-9    | acc -9            | -      | PolyPy likely pathogenic      | 5:88025159-88025327    | 8bp intron retention                  |
| <i>CHD7</i>          | 8:61763045_G/A             | 25-26  | acc -7            | +      | PolyPy likely pathogenic      | 8:61762849-61763057    | 5bp intron retention (mixed product)  |
| <i>MBD5</i>          | 2:149221493_G/C            | 8-9    | don+5             | +      | Don+5 likely pathogenic       | 2:149221483-149221651  | 12bp intron retention (mixed product) |
| <i>CREBBP</i>        | 16:3819367_C/T             | 14-15  | acc -13           | -      | PolyPy likely pathogenic      | 16:3819349-3819526     | 11bp intron retention                 |
| <i>SMARCB1</i>       | 22:24143120_T/G            | 3-4    | acc -11           | +      | PolyPy likely pathogenic      | 22:24142916-24143136   | No effect on splicing                 |
| <i>DNM1</i>          | 9:130988306_G/A            | 9-10   | acc -8            | +      | PolyPy likely pathogenic      | 9:130988199-130988319  | 6bp intron retention                  |
| <i>CTNNB1</i>        | 3:41266439_T/G             | 3-4    | acc -6            | +      | PolyPy uncertain significance | 3:41266294-41266450    | No effect on splicing                 |
| <i>MEF2C</i> control | 5:88025173_A/G (paternal)  | 8-9    | acc -9            | -      | Negative control              | 5:88025159-88025327    | No effect on splicing                 |
| <i>DNM1</i> control  | 9:130988302_C/T (maternal) | 9-10   | acc -12           | +      | Negative control              | 9:130988199-130988319  | No effect on splicing                 |

**Supplemental Table S6 – Primers used to amplify region of interest from patient DNA**

| <b>Gene of interest</b> | <b>Variant</b>                | <b>FWD primer</b>            | <b>REV primer</b>                   |
|-------------------------|-------------------------------|------------------------------|-------------------------------------|
| <b>GLI3</b>             | 7:42063221_G/C                | TGTCTCATAGATGACTTCAG         | TAAAGACCTGATTTGATTTATTCTC           |
| <b>MEF2C</b>            | 5:88025173_A/C                | TTCCTTGCTCTGGTAAAGTAGGA      | CCTACTCATTGCTCTCTGCTG               |
| <b>CHD7</b>             | 8:61763045_G/A                | GATCTGGGGAAAAATAGGGTCAGAAATC | CACCACCATCTGCTAGCATGTC              |
| <b>MBD5</b>             | 2:149221493_G/C               | TCCTGGAGCTGCTGTGAA           | GCAGAGTATTTGTATGTACTAATTAGTGTTTATTC |
| <b>CREBBP</b>           | 16:3819367_C/T                | GGAATTGGTTTCTGCGCTGG         | GCACCCGTGTTCTACCG                   |
| <b>SMARCB1</b>          | 22:24143120_T/G               | CTCAGTCTCTCCTCCTTGCT         | GCATCTAAGTGGTGGGAGC                 |
| <b>DNM1</b>             | 9:130988306_G/A               | CCATACCTATGGAGCCCAGG         | CTGATGGTGGCTGTGAGCTC                |
| <b>CTNNB1</b>           | 3:41266439_T/G                | GCCTTACTGAAAGTCAGAATGC       | GTCAGTTCAGGGATTGCACG                |
| <b>MEF2C control</b>    | 5:88025173_A/G<br>(paternal)  | TTCCTTGCTCTGGTAAAGTAGGA      | CCTACTCATTGCTCTCTGCTG               |
| <b>DNM1 control</b>     | 9:130988302_C/T<br>(maternal) | CCATACCTATGGAGCCCAGG         | CTGATGGTGGCTGTGAGCTC                |

**Supplemental Table S7 - Primers to PCR amplify ref and alt intron with Gibson overhangs**

NNN = Homology to vector backbone for Gibson Assembly mediated cloning.

NNN = Homology to GOI intron

NNN = Homology to exon flanking GOI intron

| Gene of interest      | FWD primer                                               | REV primer                                                     |
|-----------------------|----------------------------------------------------------|----------------------------------------------------------------|
| GLI3 – REF            | CTAGGCCCCAGGATAGGTACCTCTCAGAGTGATTTGGTAAATCTGAAAATATG    | CCTCCAGATCTGAGTCCGGA <u>CTGTT</u> CCTGAAAGAAGAGG <u>GTGG</u>   |
| GLI3 – ALT            | CTAGGCCCCAGGATAGGTACCTCTCAGAGTGATTTGGTAAATCTGAAAATATG    | CCTCCAGATCTGAGTCCGGA <u>CTGTT</u> CCTGAAAGAAGAGG <u>CTGG</u>   |
| MEF2C – REF           | CTAGGCCCCAGGATAGGTACGTAATGATAGGGTTGGCA                   | CCTCCAGATCTGAGTCCGGA <u>TTGATT</u> CCTTTAAATAAATAAAAAGACATTA   |
| MEF2C – ALT           | CTAGGCCCCAGGATAGGTACGTAATGATAGGGTTGGCA                   | CCTCCAGATCTGAGTCCGGA <u>TTGATT</u> CCTTTAAATAAATAAAAAGACATTA   |
| CHD7 – REF            | TAGGCCCCAGGATAGGTACGAAGTGTAACCTGGCTCCAGTA                | CCTCCAGATCTGAGTCCGGA <u>CATAGC</u> CTGTGC <u>GTGC</u>          |
| CHD7 – ALT            | TAGGCCCCAGGATAGGTACGAAGTGTAACCTGGCTCCAGTA                | CCTCCAGATCTGAGTCCGGA <u>CATAGC</u> CTGTGC <u>TGTGC</u>         |
| MBD5 – REF            | GGGGTCCCCAAATAGGTACCCAGAAGTACTGTTTCTATTTGTAATAAAATTACAGG | GCATGGACGAGCTGTACAAGGAACAAGTATGTAATATGGTGAAAGGTTCA             |
| MBD5 – ALT            | GGGGTCCCCAAATAGGTACCCAGAAGTACTGTTTCTATTTGTAATAAAATTACAGG | GCATGGACGAGCTGTACAAGGAACAAGTATCTAATATGGTGAAAGGTTCA             |
| CREBBP – REF          | CTAGGCCCCAGGATAGGTACCCCTCTAGAACTCATTCTACTTTAACCCCTG      | CCTCCAGATCTGAGTCCGGA <u>GGAAG</u> CTGTGAAAAAACCGAAAGC          |
| CREBBP – ALT          | CTAGGCCCCAGGATAGGTACCCCTCTAGAACTCATTCTACTTTAACCCCTG      | CCTCCAGATCTGAGTCCGGA <u>GGAAG</u> CTGTGAAAAAAC <u>T</u> GAAAGC |
| SMARCB1 – REF         | CTAGGCCCCAGGATAGGTACGTGCCCTACGTACCCTT                    | CCTCCAGATCTGAGTCCGGA <u>TGTTCC</u> CTGAGGAGATCAAGAAAAG         |
| SMARCB1 – ALT         | CTAGGCCCCAGGATAGGTACGTGCCCTACGTACCCTT                    | CCTCCAGATCTGAGTCCGGA <u>TGTTCC</u> CTGAGGAGATCAAGAAAAG         |
| DNM1 – REF            | TAGGCCCCAGGATAGGTACGTGCCCGTGCCATCCTCTCCAC                | CCTCCAGATCTGAGTCCGGA <u>CCCGT</u> CCTGCACCCGGG                 |
| DNM1 – ALT            | TAGGCCCCAGGATAGGTACGTGCCCGTGCCATCCTCTCCAC                | CCTCCAGATCTGAGTCCGGA <u>CCCGT</u> CCTGCACCTGGG                 |
| CTNNB1 – REF          | TAGGCCCCAGGATAGGTACGAGAACTAAAAAGTTAGTGTATAATAG           | CCTCCAGATCTGAGTCCGGA <u>CAATAT</u> CTGGAAAGGTTAATTC            |
| CTNNB1 – ALT          | TAGGCCCCAGGATAGGTACGAGAACTAAAAAGTTAGTGTATAATAG           | CCTCCAGATCTGAGTCCGGA <u>CAATAT</u> CTGGAAAGGTTAATTC            |
| MEF2C – CONTROL – ALT | CTAGGCCCCAGGATAGGTACGTAATGATAGGGTTGGCA                   | CCTCCAGATCTGAGTCCGGA <u>TTGATT</u> CCTTTAAATAAATAAAAAGACATTA   |
| DNM1 – CONTROL – ALT  | TAGGCCCCAGGATAGGTACGTGCCCGTGCCATCCTCTCCAC                | CCTCCAGATCTGAGTCCGGA <u>CCCGT</u> CCTGCACCCGGG <u>AAG</u>      |



**Supplemental Table S8 – PCR primers to amplify vector backbone**

|                    | <b>FWD primer</b>     | <b>REV primer</b>         |
|--------------------|-----------------------|---------------------------|
| Acceptor mutations | TCCGGACTCAGATCTGGAGGC | GTACCTATCCTGGGGCCTAGCCACC |
| Donor mutations    | GGTACCTATTTGGGGACCCC  | CTTGTACAGCTCGTCCATGCC     |

**Supplemental Table S9 - RT-PCR primers**

|                 | <b>FWD primer</b>      | <b>REV primer</b>         |
|-----------------|------------------------|---------------------------|
| Exon 1 – Exon 2 | CTGAGCACCCAGTCCAAG     | GATGCCCATGGCCTTGGA        |
| Exon 2 – Exon 3 | GACCATCACCTCCAGGGAGATC | GAGCACACACTTGCAGCTCA      |
| Exon 1 – Exon 3 | ACGAGAAGCGCGATCACAT    | CGTAATACGACTCACTATAGTTCTA |

**Supplemental Table S10 - Sequencing primers**

|                 |                      |
|-----------------|----------------------|
| Exon 1 – Exon 2 | ACGAGAAGCGCGATCACAT  |
| Exon 2 – Exon 3 | TGTCCGAGGGTACTAAGGC  |
| Exon 1 – Exon 3 | GAGCACACACTTGCAGCTCA |
